# Supplementary material for: Major β cell-specific functions of NKX2.2 are mediated via the NK2-specific domain
Source: PubMed Central journal article supplement (PMC10393193; doi:10.1101/gad.350569.123), 2023-06-01
Supplement: supp_gad.350569.123_Supplemental_Fig_S1.pdf [file supp_gad.350569.123_Supplemental_Fig_S1.pdf]

## Abarinov Supplemental Figure S1.

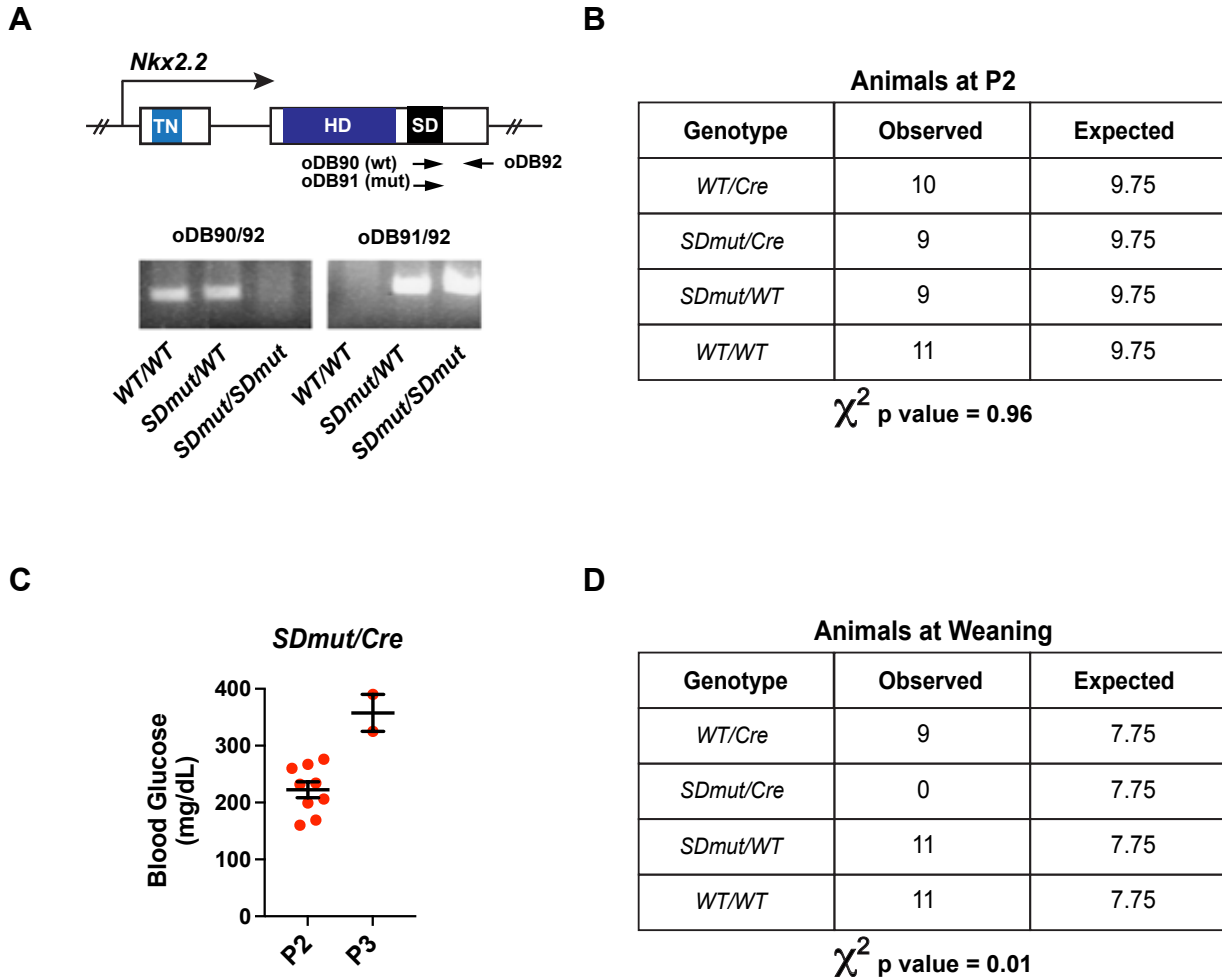

Figure S1. Additional characterization of  $Nkx2.2^{SDmut/Cre}$  mice. (A) Genotyping scheme for the  $Nkx2.2^{SDmut}$  allele. Gel shows the PCR products pertaining to  $Nkx2.2^{+/+}$  (WT/WT),  $Nkx2.2^{SDmut/+}$  (SDmut/WT), and  $Nkx2.2^{SDmut/SDmut}$  (SDmut/SDmut) animals. (B) Chi Square analysis at P2 demonstrates that  $Nkx2.2^{SDmut/Cre}$  mice are born at normal Mendelian ratios. (C)  $Nkx2.2^{SDmut/Cre}$  neonates experience worsening blood glucose levels at P3 compared to P2. Data are presented as mean  $\pm$  SEM. (D) Chi Square analysis of genotypes obtained at weaning. No  $Nkx2.2^{SDmut/Cre}$  animals survived to this point of development. n's are indicated in tables and by data points on graph.
