# Supplementary material for: Major β cell-specific functions of NKX2.2 are mediated via the NK2-specific domain
Source: PubMed Central journal article supplement (PMC10393193; doi:10.1101/gad.350569.123), 2023-06-01
Supplement: supp_gad.350569.123_Supplemental_Fig_S2.pdf [file supp_gad.350569.123_Supplemental_Fig_S2.pdf]

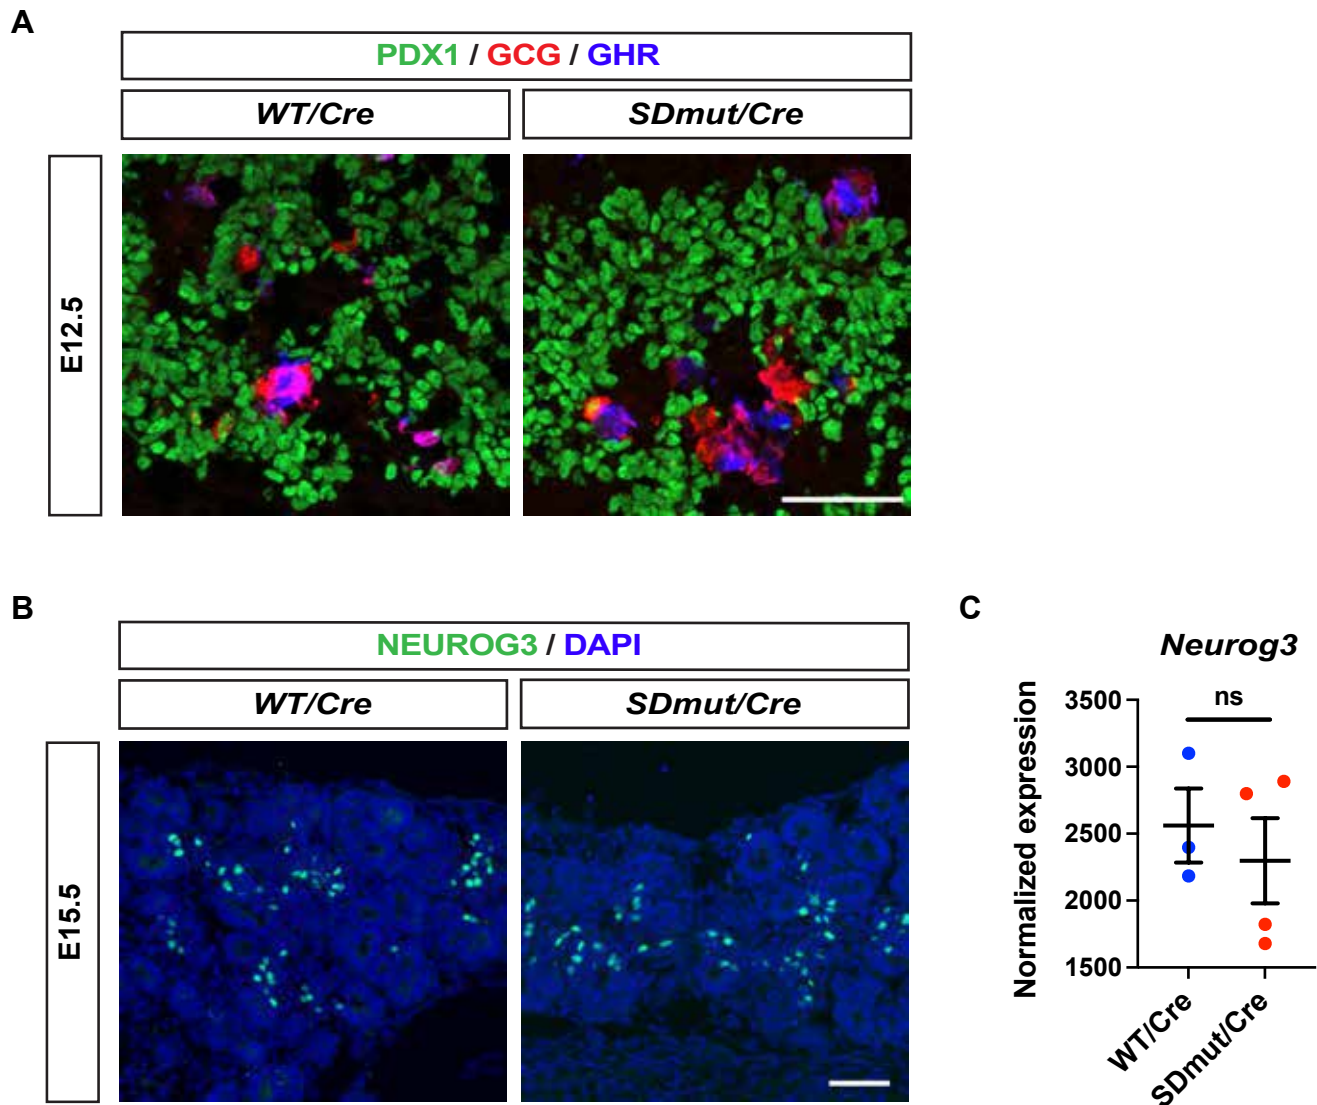

Figure S2. Endocrine specification at E12.5 and endocrine progenitor generation at E15.5 appear normal in  $Nkx2.2^{SDmut/Cre}$  animals. (A) PDX1, GCG, and GHR expression is similar between  $Nkx2.2^{Cre/+}$  (WT/Cre) and  $Nkx2.2^{SDmut/Cre}$  (SDmut/Cre) embryos at E12.5.  $n = 2$ . (B-C) NEUROG3 protein (B) and mRNA (C) expression are comparable between  $Nkx2.2^{Cre/+}$  (WT/Cre) and  $Nkx2.2^{SDmut/Cre}$  (SDmut/Cre) pancreata at E15.5. Transcript levels of Neurog3 were obtained from the RNA-seq described in Figure 3.  $n = 3-4$ . Data are presented as mean  $\pm$  SEM. ns, not significant. Scale bars represent 50 $\mu$ m.
