# Supplementary material for: Major β cell-specific functions of NKX2.2 are mediated via the NK2-specific domain
Source: PubMed Central journal article supplement (PMC10393193; doi:10.1101/gad.350569.123), 2023-06-01
Supplement: supp_gad.350569.123_Supplemental_Fig_S3.pdf [file supp_gad.350569.123_Supplemental_Fig_S3.pdf]

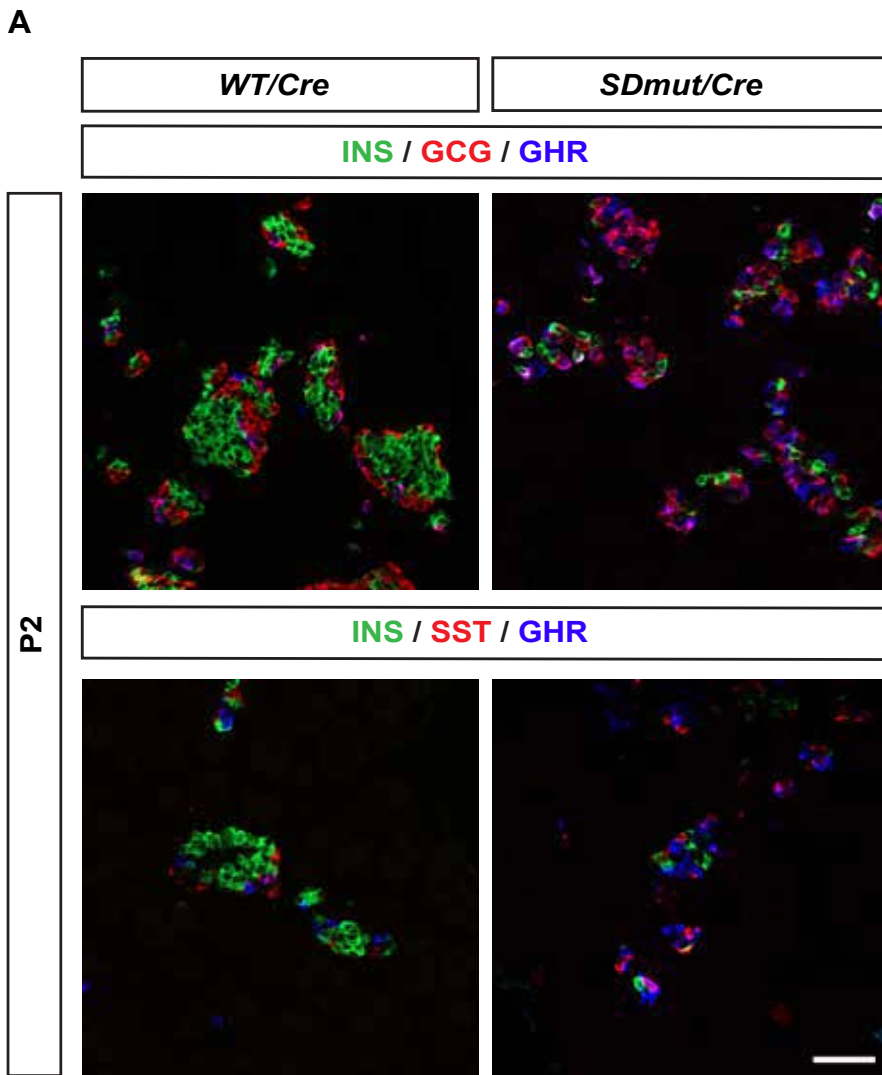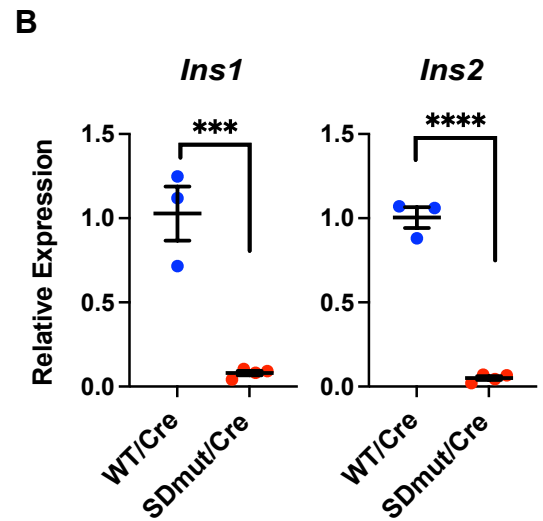

Figure S3.  $Nkx2.2^{SDmut/Cre}$  neonates continue to show a loss of  $\beta$  cells and altered islet formation at P2. (A)  $Nkx2.2^{SDmut/Cre}$  mutant islets show reduced INS+ cells combined with an overrepresentation of GCG+, GHR+, and SST+ populations. (B) qRT-PCR analysis of *Ins1* and *Ins2* confirms the decreased  $\beta$  cell generation in  $Nkx2.2^{SDmut/Cre}$  animals. Data are presented as mean  $\pm$  SEM. \*\*\* $p < 0.001$ , \*\*\*\* $p < 0.0001$ . n's are indicated by data points. Scale bars represent 50 $\mu$ m.
