# Supplementary material for: Major β cell-specific functions of NKX2.2 are mediated via the NK2-specific domain
Source: PubMed Central journal article supplement (PMC10393193; doi:10.1101/gad.350569.123), 2023-06-01
Supplement: supp_gad.350569.123_Supplemental_Fig_S5.pdf [file supp_gad.350569.123_Supplemental_Fig_S5.pdf]

# Abarinov Figure S5.

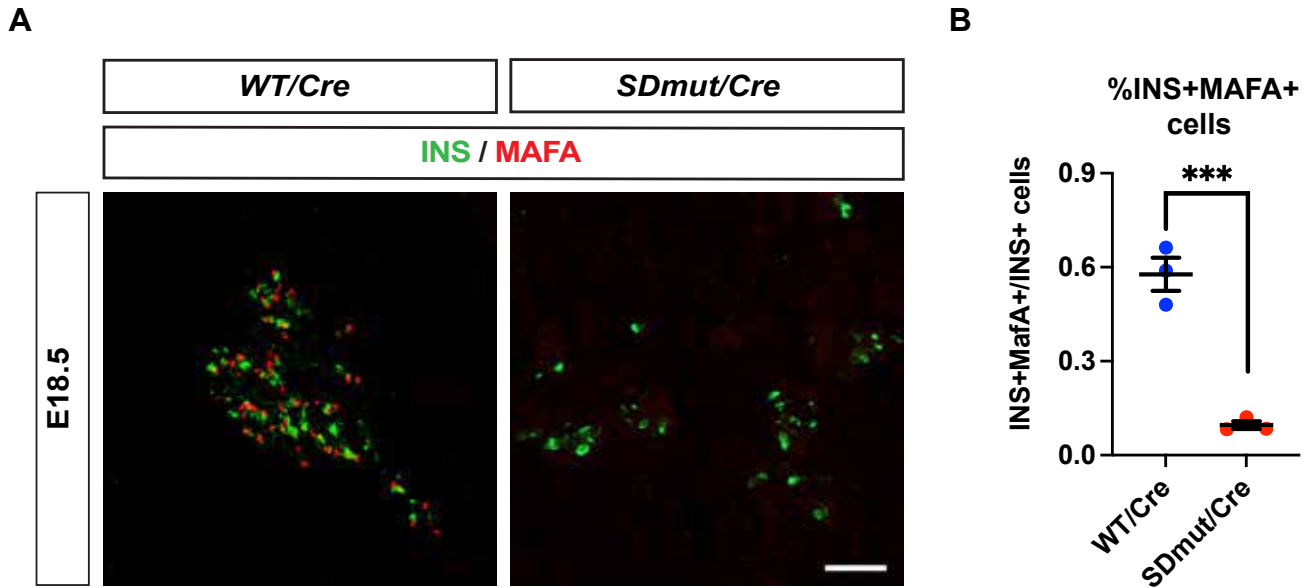

Figure S5. MAFA-expressing cells are significantly reduced in *Nkx2.2<sup>SDmut/Cre</sup>* embryos at E18.5. (A) INS and MAFA co-expression is rarely seen in *Nkx2.2<sup>SDmut/Cre</sup>* embryos. (B) Quantification confirms that the percentage of INS+ cells expressing MAFA is significantly reduced in *Nkx2.2<sup>SDmut/Cre</sup>* mice. Data are presented as mean  $\pm$  SEM. \*\*\* $p < 0.001$ . n's are indicated by data points. Scale bar represents 50 $\mu$ m.
