# Supplementary material for: Major β cell-specific functions of NKX2.2 are mediated via the NK2-specific domain
Source: PubMed Central journal article supplement (PMC10393193; doi:10.1101/gad.350569.123), 2023-06-01
Supplement: supp_gad.350569.123_Supplemental_Fig_S6_legend.pdf [file supp_gad.350569.123_Supplemental_Fig_S6_legend.pdf]

## Abarinov Figure S6 Cont.

Figure S6. Further characterization of *RIP-Cre; Nkx2.2<sup>SDmut/flox</sup>* ( $\beta$ SDmut) animals. (A) Integrative Genomics Viewer (IGV) RNA-seq tracks from representative *RIP-Cre; Nkx2.2<sup>flox/+</sup>* (CTRL) and *RIP-Cre; Nkx2.2<sup>SDmut/flox</sup>* ( $\beta$ SDmut) adult islets and from iSDmut day 4 neural progenitors (see Fig. 6) at the endogenous wildtype (WT) *Nkx2.2* gene locus. RNA-seq reads from CTRL animals align to the SD domain (highlighted in red) while those from  $\beta$ SDmut and iSDmut samples do not—confirming expression of the mutant, rather than WT, SD allele in  $\beta$ SDmut mice and iSDmut cells. (B) Quantification of the percent expression of each *Nkx2.2* allele from RNA-seq analysis on adult islets. The small percentage of WT *Nkx2.2* expression in  $\beta$ SDmut animals is likely due to *Nkx2.2* expression that is maintained in  $\alpha$  cells and/or incomplete deletion of the conditional *Nkx2.2<sup>flox</sup>* allele in  $\beta$  cells. (C-E) Female  $\beta$ SDmut mice develop diabetes similar to males. Females exhibit normal body weight (C) but increased *ad lib* blood glucose levels (D) and impaired glucose clearance (E) during the intraperitoneal glucose tolerance test (IP-GTT) compared to control *RIP-Cre; Nkx2.2<sup>flox/+</sup>* (CTRL) animals at 4wks. (F) Gastrin (GAST) protein expression is absent from both CTRL and  $\beta$ SDmut mice at 4wks. (G) RNA-seq analysis of islets from CTRL and  $\beta$ SDmut 8wk animals shows no significant changes in *Nkx2.2* or hormone expression. (H) Heatmap (left) and gene ontology (GO) analysis (right) of significantly altered genes identified between  $\beta$ SDmut and CTRL 8wk islets. (I) GO analysis of the 171 genes bound by NKX2.2 and specifically down-regulated in  $\beta$ SDmut animals compared to CTRLS and of the forty-one genes specifically down-regulated in  $\beta$ KO vs. CTRL islets. (J) GO analysis of the thirty-five genes specifically up-regulated in  $\beta$ KO vs. CTRL islets. Data are presented as mean  $\pm$  SEM. \* $p < 0.05$ , \*\* $p < 0.01$ , \*\*\* $p < 0.001$ . n's are indicated by data points. Scale bar represents 50 $\mu$ m.
