# Supplementary material for: Major β cell-specific functions of NKX2.2 are mediated via the NK2-specific domain
Source: PubMed Central journal article supplement (PMC10393193; doi:10.1101/gad.350569.123), 2023-06-01
Supplement: supp_gad.350569.123_Supplemental_Fig_S8.pdf [file supp_gad.350569.123_Supplemental_Fig_S8.pdf]

## Abarinov Figure S8.

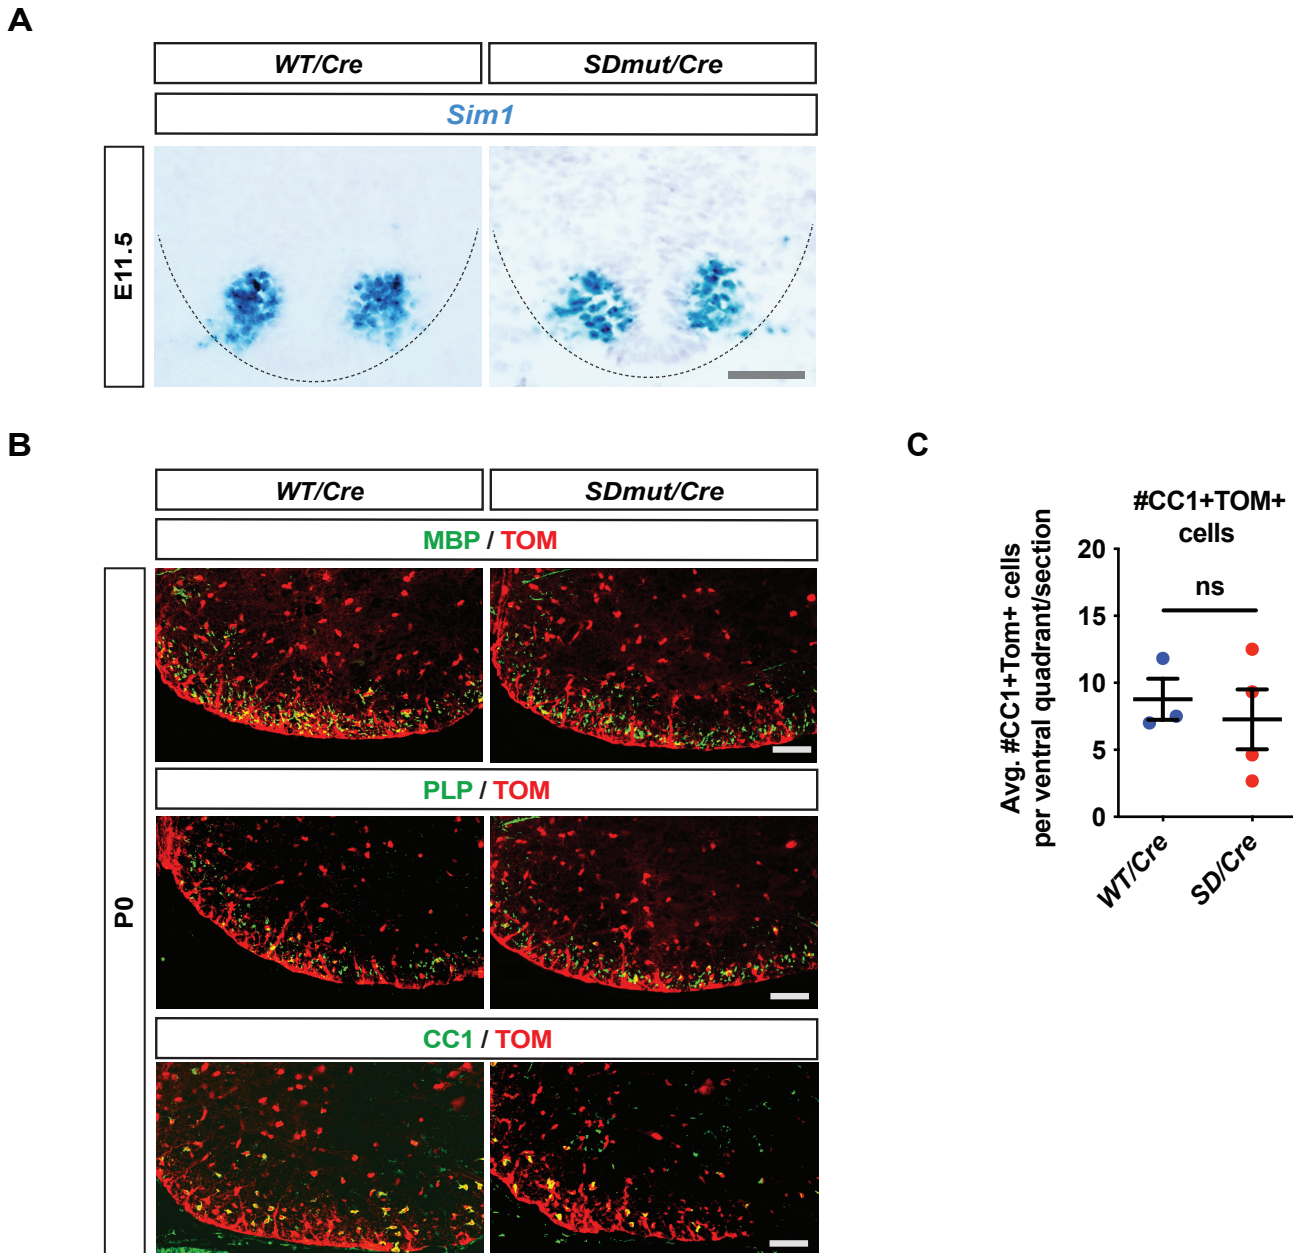

Figure S8. V3 interneurons and mature oligodendrocytes (OLGs) are generated normally in *Nkx2.2<sup>SDmut/Cre</sup>* animals at E11.5 and P0, respectively. (A) *Sim1* *in situ* hybridization shows similar expression between *Nkx2.2<sup>Cre/+</sup>* (WT/Cre) and *Nkx2.2<sup>SDmut/Cre</sup>* (SDmut/Cre) E11.5 embryos. (B) Expression of mature OLG markers—MBP, PLP, and CC1—appears similar in *Nkx2.2<sup>Cre/+</sup>* and *Nkx2.2<sup>SDmut/Cre</sup>* P0 neonates. (C) Quantification of CC1+TOM+ cells from C reveals no significant differences between control and mutant mice. Data are presented as mean  $\pm$  SEM. ns, not significant. n's are indicated by data points. Scale bars represent 50 $\mu$ m.
