# Supplementary material for: Major β cell-specific functions of NKX2.2 are mediated via the NK2-specific domain
Source: PubMed Central journal article supplement (PMC10393193; doi:10.1101/gad.350569.123), 2023-06-01

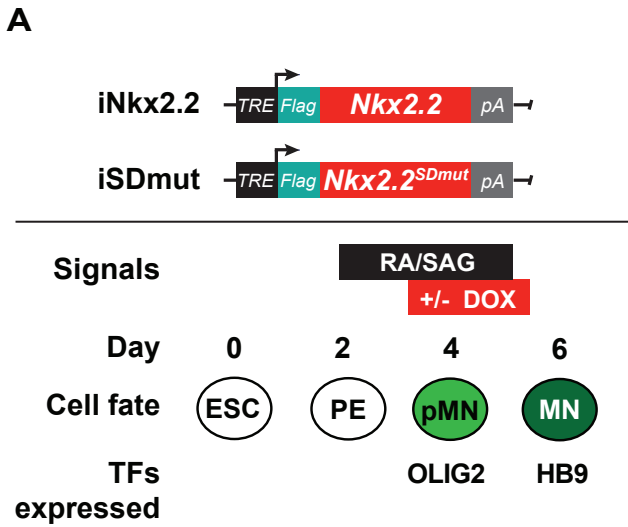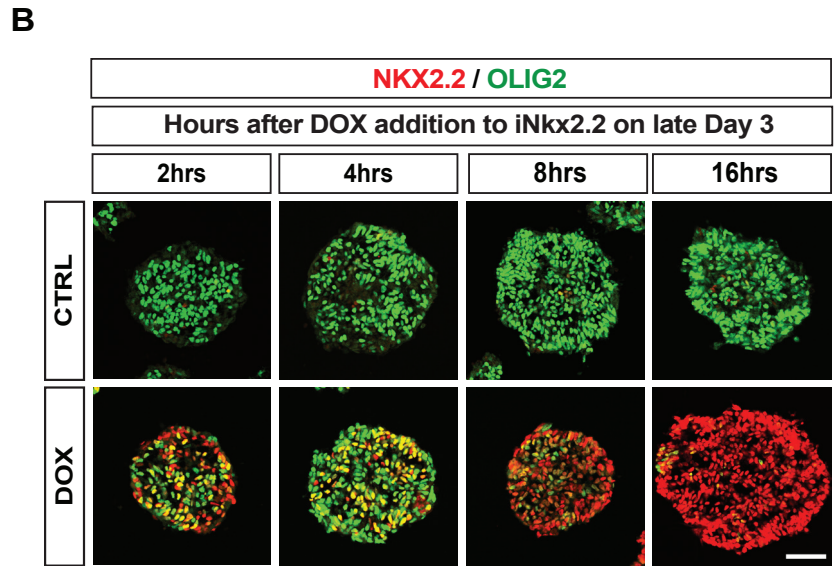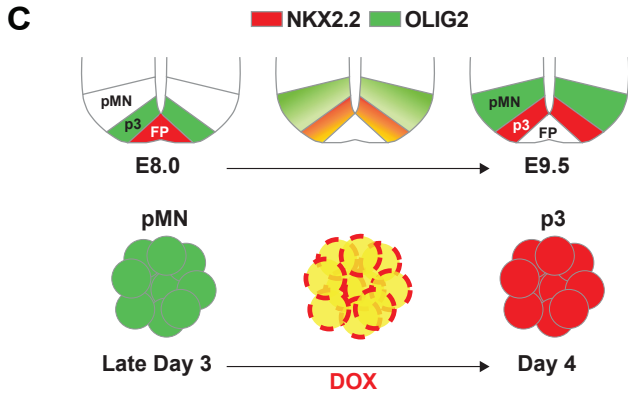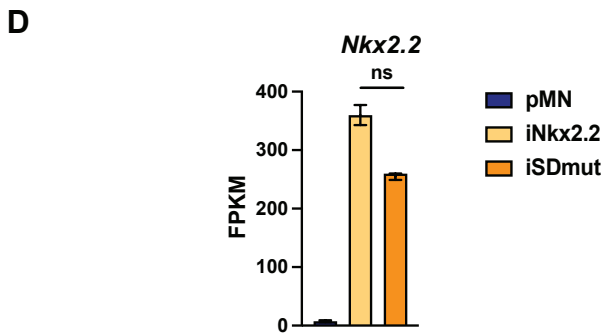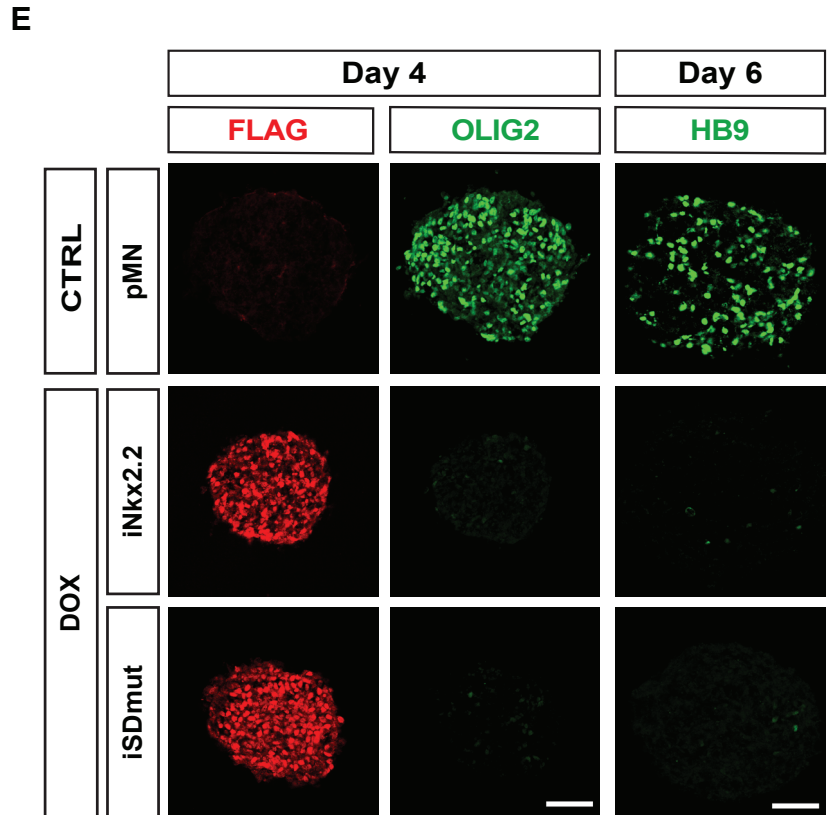

Supplement: supp_gad.350569.123_Supplemental_Fig_S10.pdf [file supp_gad.350569.123_Supplemental_Fig_S10.pdf]
