# Supplementary material for: Major β cell-specific functions of NKX2.2 are mediated via the NK2-specific domain
Source: PubMed Central journal article supplement (PMC10393193; doi:10.1101/gad.350569.123), 2023-06-01
Supplement: supp_gad.350569.123_Supplemental_tables.pdf [file supp_gad.350569.123_Supplemental_tables.pdf]

**Supplementary Table 1.** List of primary and secondary antibodies used in this study.

| <b>Pancreas</b>             |                |                                                                     |                 |                               |
|-----------------------------|----------------|---------------------------------------------------------------------|-----------------|-------------------------------|
| <b>Antibody</b>             | <b>Species</b> | <b>Source</b>                                                       | <b>Catalog#</b> | <b>Dilution</b>               |
| Insulin                     | Rabbit         | Cell Signaling Technology                                           | 3014            | 1:500                         |
| Insulin                     | Guinea Pig     | Agilent / DAKO                                                      | IR00261-2       | 1:10                          |
| Glucagon                    | Rabbit         | Cell Signaling Technologies                                         | 2760S           | 1:250                         |
| Glucagon                    | Goat           | Santa Cruz                                                          | sc-7779         | 1:200                         |
| Somatostatin                | Rat            | Abcam                                                               | ab30788         | 1:500                         |
| Ghrelin                     | Goat           | Santa Cruz                                                          | sc-0368         | 1:500                         |
| ChgA                        | Rabbit         | Millipore                                                           | AB9254          | 1:500                         |
| Nkx2.2                      | Rabbit         | Sigma Prestige                                                      | HPA003468       | 1:100                         |
| Nkx6.1                      | Goat           | R&D                                                                 | AF5857          | 1:1000                        |
| Nkx6.1                      | Rabbit         | Beta Cell Biology Consortium                                        | ab1069          | 1:800                         |
| MafA                        | Rabbit         | Bethyl                                                              | IHC-00352       | 1:50 (P2)<br>1:500<br>(E18.5) |
| MafB                        | Rabbit         | Bethyl                                                              | A700-046        | 1:100                         |
| Pdx1                        | Rabbit         | Millipore                                                           | 07-696          | 1:1000                        |
| Pdx1                        | Goat           | Millipore                                                           | 06-1385         | 1:500                         |
| GLUT2                       | Rabbit         | Millipore                                                           | 07-1402         | 1:500                         |
| <b>CNS</b>                  |                |                                                                     |                 |                               |
| <b>Antibody</b>             | <b>Species</b> | <b>Source</b>                                                       | <b>Catalog#</b> | <b>Dilution</b>               |
| Nkx2.2                      | Mouse          | DSHB                                                                | 74.5A5          | 1:100                         |
| Olig2                       | Rabbit         | Millipore                                                           | AB9610          | 1:1,000                       |
| Hb9                         | Guinea Pig     | Generous gift from Thomas M. Jessell and Susan Morton (Columbia U.) | N/A             | 1:5,000                       |
| MBP                         | Mouse          | Abcam                                                               | ab11159         | 1:500                         |
| PLP                         | Mouse          | Abcam                                                               | ab9311          | 1:500                         |
| CC1                         | Mouse          | Calbiochem                                                          | OP44-100UG      | 1:500                         |
| 5HT                         | Rabbit         | Sigma                                                               | S5545-25UL      | 1:500                         |
| Flag                        | Mouse          | Sigma                                                               | F1804           | 1:100                         |
| <b>Secondary antibodies</b> |                |                                                                     |                 |                               |
| <b>Antibody</b>             | <b>Channel</b> | <b>Source</b>                                                       | <b>Catalog#</b> | <b>Dilution</b>               |
| Donkey anti guinea pig      | 488            | Jackson Immuno Research                                             | 706-545-148     | 1:500                         |
| Donkey anti                 | 594            | Invitrogen                                                          | A21207          | 1:500                         |

|                   |     |            |        |       |
|-------------------|-----|------------|--------|-------|
| rabbit            |     |            |        |       |
| Donkey anti goat  | 697 | Invitrogen | A21447 | 1:500 |
| Donkey anti mouse | 488 | Invitrogen | A21202 | 1:500 |
| Donkey anti rat   | 594 | Invitrogen | A21209 | 1:500 |

**Supplementary Table 2.** List of TaqMan probes used in this study.

| <b>Gene</b>                     | <b>Assay ID</b> |
|---------------------------------|-----------------|
| <i>Ins1</i>                     | Mm01950294_s1   |
| <i>Ins2</i>                     | Mm00731595_gH   |
| <i>Gcg</i>                      | Mm00801714_m1   |
| <i>Ghrl</i>                     | Mm00445450_m1   |
| <i>Sst</i>                      | Mm00436671_m1   |
| <i>Gast</i>                     | Mm00439059_g1   |
| <i>ChgA</i>                     | Mm00514341_m1   |
| <i>Nkx6.1</i>                   | Mm00454961_m1   |
| <i>Pdx1</i>                     | Mm00435565_m1   |
| <i>Arx</i>                      | Mm00545903_m1   |
| <i>Glut2</i>                    | Mm00446229_m1   |
| <i><math>\beta</math>-actin</i> | Mm00607939_s1   |

Supplementary Table 3. NKX2.2 protein interactions reduced by mutation of the SD domain specifically. MYC-tagged wildtype (WT), TN domain-mutated (TNmut), SD domain-mutated (SDmut), and TN-mutated and SD-mutated (TNmut/SDmut) *Nkx2.2* constructs were expressed in MIN6 cells. A vector containing the MYC tag but no *Nkx2.2* sequence served as the control (CTRL). Mass spectrometry spectra counts for proteins that interacted with WT NKX2.2 and TNmut NKX2.2 but showed reduced interactions (lower spectra counts) with SDmut NKX2.2 and TNmut/SDmut NKX2.2 are presented. NKX2.2 counts for each condition are shown in red for reference.

| Protein name                                                          | Accession #   | Symbol        | CTRL     | WT        | TNmut     | SDmut     | TNmut/SDmut |
|-----------------------------------------------------------------------|---------------|---------------|----------|-----------|-----------|-----------|-------------|
| <b>Homeobox protein NKX2.2</b>                                        | <b>P42586</b> | <b>Nkx2.2</b> | <b>0</b> | <b>31</b> | <b>22</b> | <b>25</b> | <b>21</b>   |
| Alpha-centractin                                                      | P61164        | Actr1a        | 0        | 1         | 2         | 0         | 0           |
| Aminoacyl tRNA synthase complex-interacting multifunctional protein 2 | Q8R010        | Aimp2         | 0        | 1         | 1         | 0         | 0           |
| AP-2 complex subunit mu                                               | P84091        | Ap2m1         | 0        | 1         | 2         | 0         | 0           |
| ATP-dependent RNA helicase DDX51                                      | Q6P9R1        | Ddx51         | 0        | 1         | 2         | 0         | 0           |
| Bifunctional aminoacyl-tRNA synthetase                                | Q8CGC7        | Eprs          | 0        | 3         | 2         | 0         | 0           |
| Borealin                                                              | Q8BHX3        | Cdca8         | 0        | 1         | 3         | 0         | 0           |
| Catenin delta-2 ctnd2                                                 | O35927        | Ctnnd2        | 0        | 1         | 1         | 0         | 0           |
| Chromosome-associated kinesin KIF4                                    | P33174        | Kif4          | 0        | 2         | 2         | 1         | 0           |
| Cytoplasmic dynein 1 light intermediate chain 1                       | Q8R1Q8        | Dync1li1      | 0        | 1         | 1         | 0         | 0           |
| Dedicator of cytokinesis protein 11                                   | A2AF47        | Dock11        | 0        | 1         | 2         | 0         | 0           |
| Double-strand-break repair protein rad21 homolog                      | Q61550        | Rad21         | 0        | 3         | 5         | 1         | 0           |
| E3 SUMO-protein ligase RanBP2                                         | Q9ERU9        | Ranbp2        | 0        | 4         | 3         | 1         | 1           |
| Elongation factor 1-beta                                              | O70251        | Eef1b2        | 0        | 4         | 5         | 2         | 0           |
| Fatty acid desaturase 1                                               | Q920L1        | Fads1         | 0        | 1         | 1         | 0         | 0           |
| GTP-binding protein 1                                                 | O08582        | Gtpbp1        | 0        | 1         | 1         | 0         | 0           |
| Histone-lysine N-methyltransferase, H3 lysine-9 specific 3 EHMT2      | Q9Z148        | Ehmt2         | 0        | 1         | 1         | 0         | 0           |
| Kinesin-like protein KIFC1                                            | Q9QWT9        | Kifc1         | 0        | 2         | 3         | 1         | 0           |
| Lysine-specific histone demethylase 1A                                | Q6ZQ88        | Kdm1a         | 0        | 5         | 4         | 1         | 2           |
| Mortality factor 4-like protein 2                                     | Q9R0Q4        | Morf4l2       | 0        | 1         | 1         | 0         | 0           |
| Myosin-10                                                             | Q61879        | Myh10         | 0        | 9         | 7         | 2         | 1           |
| Myosin-1c                                                             | Q9WTI7        | Myo1c         | 0        | 3         | 4         | 1         | 0           |
| Nuclear pore complex protein Nup93                                    | Q8BJ71        | Nup93         | 0        | 1         | 1         | 0         | 0           |
| Nuclear pore membrane glycoprotein 210 Nup210                         | Q9QY81        | Nup210        | 0        | 3         | 4         | 1         | 0           |
| Nucleolar protein 8                                                   | Q3UHX0        | Nol8          | 0        | 8         | 6         | 3         | 2           |
| Periphilin-1                                                          | Q8K2H1        | Pphln1        | 0        | 1         | 1         | 0         | 0           |
| Protein DEK                                                           | Q7TNV0        | Dek           | 0        | 1         | 2         | 0         | 0           |
| Ras GTPase-activating-like protein IQGAP1                             | Q9JKF1        | Iqgap1        | 0        | 1         | 1         | 0         | 0           |
| Ribosomal RNA processing protein 1 homolog B                          | Q91YK2        | Rrp1b         | 0        | 1         | 1         | 0         | 0           |
| Septin-9                                                              | Q80UG5        | Septin9       | 0        | 4         | 4         | 2         | 0           |
| Serine/threonine-protein kinase 12                                    | O70126        | Aurkb         | 0        | 2         | 2         | 1         | 0           |
| SH3 domain-containing kinase-binding protein 1                        | Q8R550        | Sh3kbp1       | 0        | 1         | 3         | 0         | 0           |
| Structural maintenance of chromosomes protein 3                       | Q9CW03        | Smc3          | 0        | 6         | 7         | 3         | 2           |
| Structural maintenance of chromosomes protein 5                       | Q8CG46        | Smc5          | 0        | 3         | 2         | 1         | 0           |
| Structural maintenance of chromosomes protein 6                       | Q924W5        | Smc6          | 0        | 2         | 2         | 1         | 0           |
| Suppressor of SWI4 1 homolog Ppan                                     | Q91YU8        | Ppan          | 0        | 1         | 1         | 0         | 0           |
| Transcriptional regulator ATRX                                        | Q61687        | Atrx          | 0        | 7         | 7         | 3         | 1           |
| UPF0568 protein C14orf166 homolog                                     | Q9CQE8        | Rtraf         | 0        | 3         | 3         | 1         | 1           |
| Wiskott-Aldrich syndrome protein family member 1                      | Q8R5H6        | Wasf1         | 0        | 2         | 2         | 0         | 0           |
| YLP motif-containing protein 1                                        | Q9R0I7        | Ylpm1         | 0        | 1         | 1         | 0         | 0           |
